# Supplementary material for: Identification of immunogenic cell death‑related prognostic signatures in pancreatic cancer
Source: PubMed Central journal article supplement — Oncol Lett. 2023 Sep 20;26(5):473. doi: 10.3892/ol.2023.14061 (PMC10551861; doi:10.3892/ol.2023.14061), 2023-09-20

Figure S1. Protein-protein interaction of differentially expressed immunogenic cell death-related genes in pancreatic cancer.

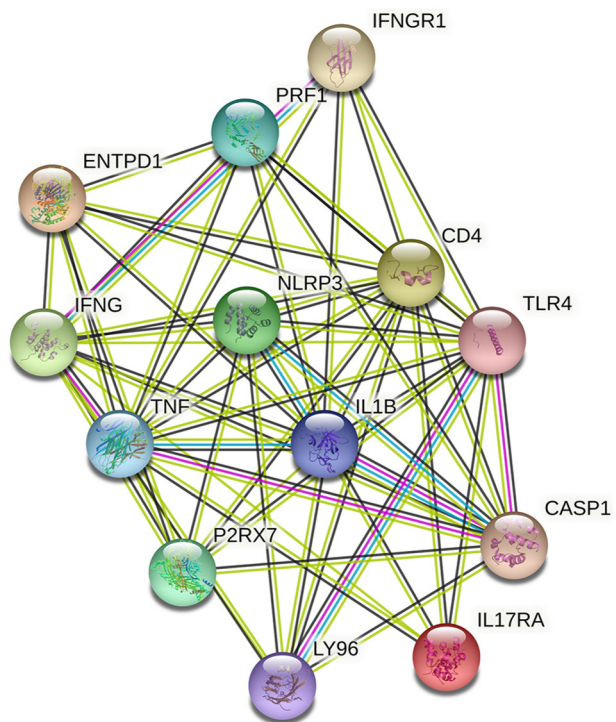

Supplement: Supplementary_Data.pdf [file Supplementary_Data.pdf]
